# Supplementary material for: Cdc42-Dependent Transfer of mir301 from Breast Cancer-Derived Extracellular Vesicles Regulates the Matrix Modulating Ability of Astrocytes at the Blood–Brain Barrier
Source: MDPI journal article supplement (doi:10.3390/ijms21113851), 2020-05-28
Supplement: s1 [file s1]

## Supplemental Figures for:

# **Cdc42-Dependent Transfer of mir301 from Breast Cancer-Derived Extracellular Vesicles Regulates the Matrix Modulating Ability of Astrocytes at the Blood–Brain Barrier**

**Golnaz Morad<sup>1,2,3</sup>, Cassandra C. Daisy<sup>1</sup>, Hasan H. Otu<sup>4</sup>, Towia A. Libermann<sup>5,6</sup>, Simon T. Dillon<sup>5,6</sup>,  
Marsha A. Moses<sup>\*1,2,7</sup>**

<sup>1</sup> Vascular Biology Program, Boston Children's Hospital, Boston, MA, 02115, USA;

<sup>2</sup> Department of Surgery, Harvard Medical School, Boston, MA, 02115, USA;

<sup>3</sup> Graduate School of Arts and Sciences, Harvard University, Cambridge, MA, 02138, USA;

<sup>4</sup> Department of Electrical and Computer Engineering, University of Nebraska-Lincoln, Lincoln, NE, 68588, USA;

<sup>5</sup> BIDMC Genomics, Proteomics, Bioinformatics and Systems Biology Center, Beth Israel Deaconess Medical Center, Boston, MA, 02115, USA;

<sup>6</sup> Department of Medicine, Harvard Medical School, Boston, MA, 02115, USA;

<sup>7</sup> Department of Surgery, Boston Children's Hospital, Boston, MA, 02115, USA.

\*To whom correspondence should be addressed:

Marsha A. Moses, Ph.D.

Vascular Biology Program

Boston Children's Hospital

The Karp Family Research Building

300 Longwood Avenue, Boston MA 02115

Phone (617) 919-2207

Fax (617) 730-0231

Email: [marsha.moses@childrens.harvard.edu](mailto:marsha.moses@childrens.harvard.edu)

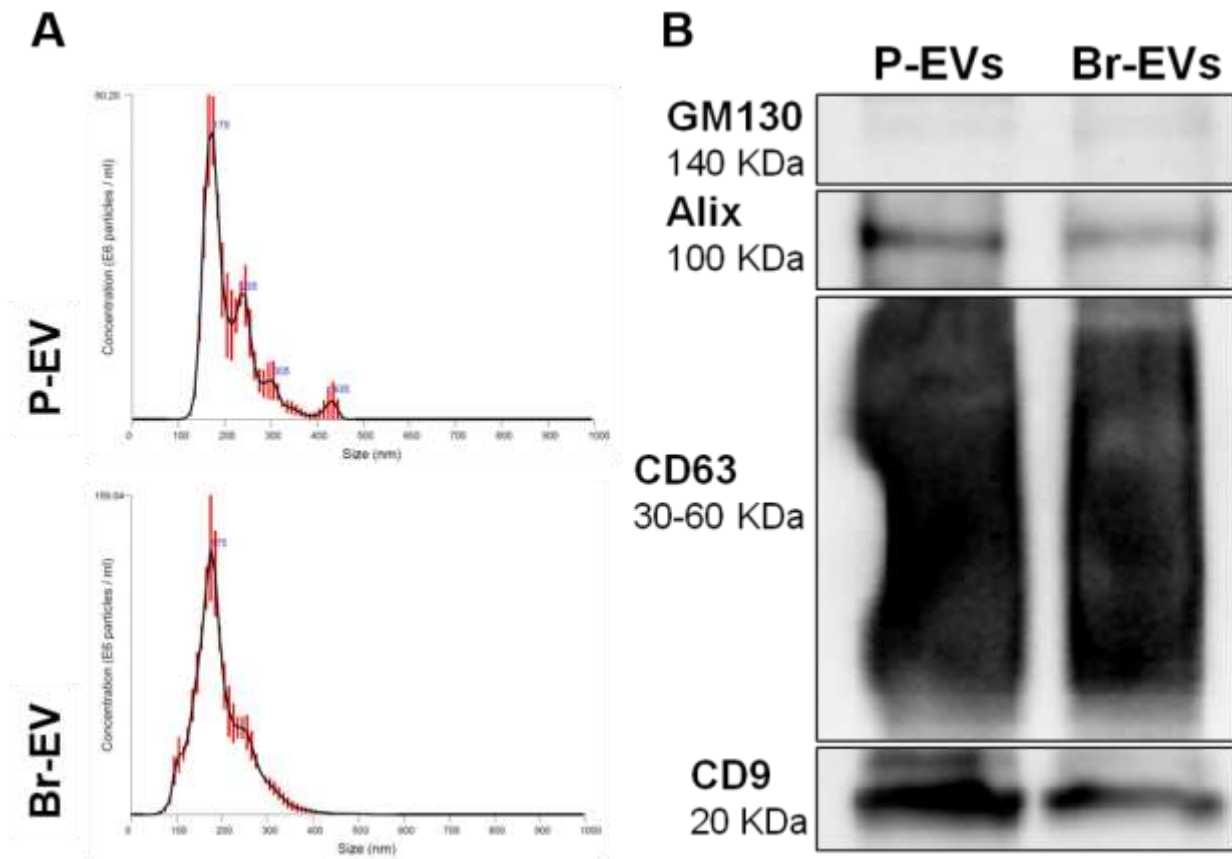

**Figure S1. Characterization of breast cancer-derived EVs.** (A) Nanoparticle tracking analysis of the size of P-EVs and Br-EVs. (B) Representative western blot images of EV markers CD9, CD63, Alix, and the golgi marker, GM130.

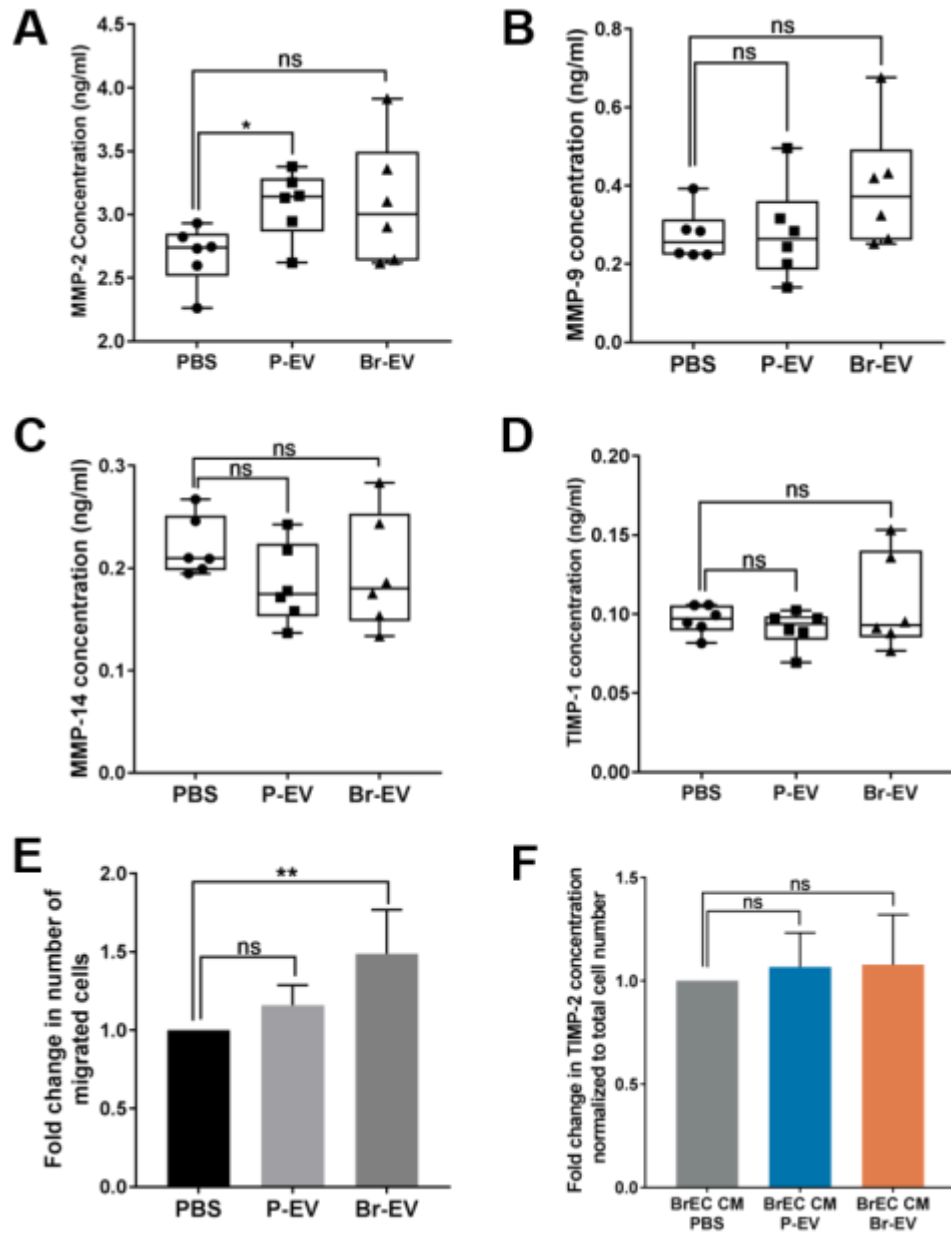

**Figure S2. Effect of breast cancer-derived EVs on matrix metalloproteinases and their endogenous inhibitors.** Average concentration of (A) MMP-2, (B) MMP-9, (C) MMP-14, and (D) TIMP-1 in brain tissue homogenates measured by ELISA (mean  $\pm$  SD;  $n = 6$  mice per group). Statistical analysis was performed using Mann-Whitney test. (E) Fold change in the number of migrated astrocytes in a transwell migration assay following pre-treatment with PBS, P- or Br-EVs (mean  $\pm$  SD; 3 independent experiments). Statistical analysis was performed using one-way ANOVA with Tukey's test for multiple comparison. (F) Fold change in the concentration of TIMP-2 in astrocyte conditioned media following treatment with conditioned media from PBS-, P-EV, and Br-EV-treated endothelial cells (mean  $\pm$  SD; 3 independent experiments). Statistical analysis was performed using one-way ANOVA. In all panels, ns, not significant; \*  $p \leq 0.05$ ; \*\*  $p \leq 0.01$ ; \*\*\*  $p \leq 0.001$ .
