# Supplementary figures and images for: Cdc42-Dependent Transfer of mir301 from Breast Cancer-Derived Extracellular Vesicles Regulates the Matrix Modulating Ability of Astrocytes at the Blood–Brain Barrier
Source: MDPI journal article supplement (doi:10.3390/ijms21113851), 2020-05-28

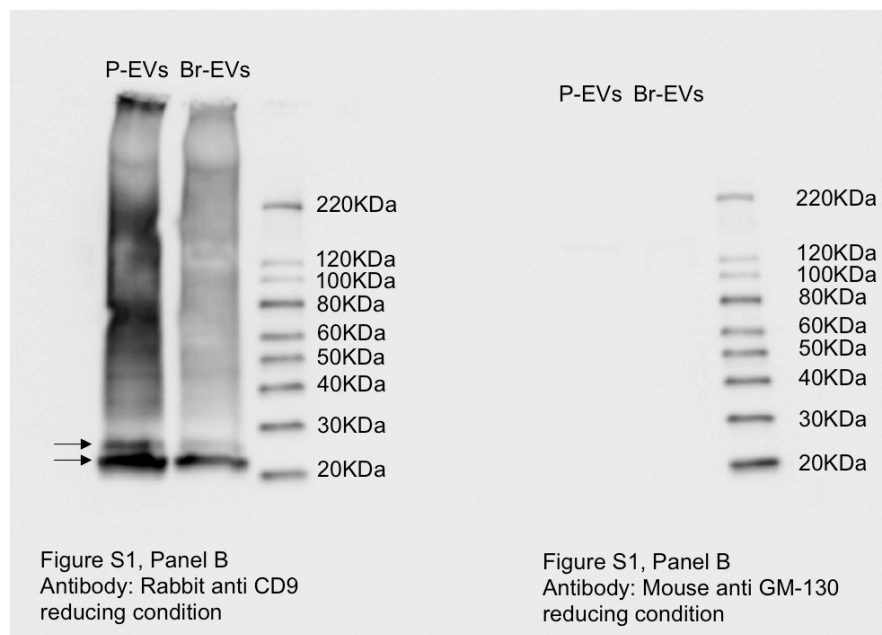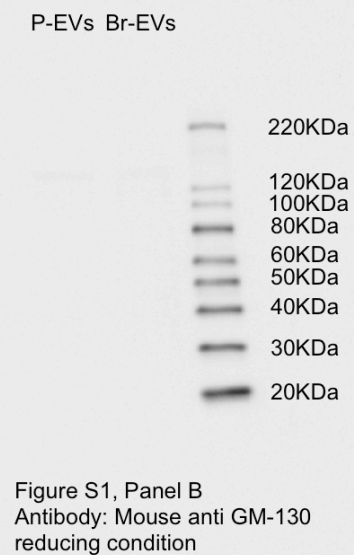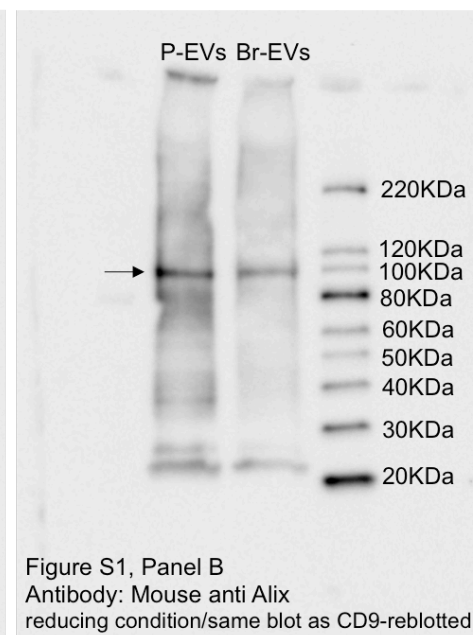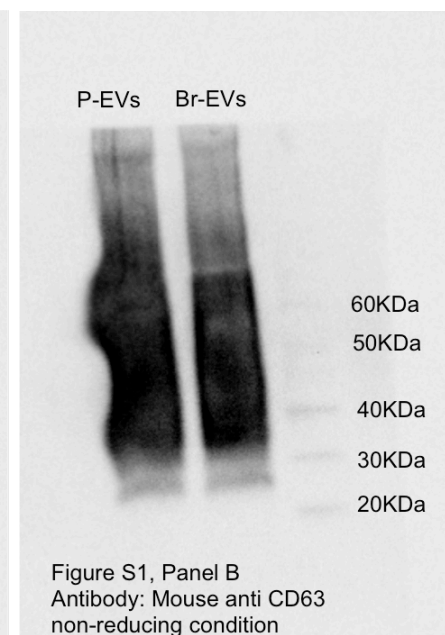

Supplement: s1 [file s1]
